# Supplementary material for: Developmental dynamics of Kranz cell transcriptional specificity in maize leaf reveals early onset of C4-related processes
Source: PubMed Central journal article supplement (PMC4085964; doi:10.1093/jxb/eru152), 2014-04-30

Tausta et al.

## **SUPPLEMENTAL DATA LEGENDS**

### **Supplementary Dataset S1. All BS and M DE genes.**

This sheet is the list of 7,994 genes determined to be DE in BS or M cells for three developmental sections of maize leaf blade. For each gene, Mapman annotations and best rice and *Arabidopsis* homologs are given. The  $\log_2$  transformed BS/M expression ratio is found in columns H, I, J followed by the average of the upper quartile-normalized expression values from 2 biological isolations of LM-isolated RNA from either BS or M cells in L-Q. FDR values for each section are in columns S,T,U.

### **Supplementary Dataset S2. DE gene lists for C4, TIM, GS-PK, Aquaporin, IAA, Methionine salvage.**

The dataset contains genes mentioned in the body of the paper. Activity was inferred primarily from Mapman annotation. Included in all are the  $\log_2$ BS/M values determined in this analysis. For the TIM, GS-PK, Aquaporin, IAA lists the normalized data for each cell type and section and the whole section data from (Li *et al.*, 2010) is also included. Blue shading of values of 1 (2 fold) or higher indicates a BS-biased ratio and green indicates values of -1 (2 fold) or lower and an M-biased ratio. For the methionine salvage pathway-related genes only the tip data is presented in addition to the  $\log_2$ BS/M values.

### **Supplementary Dataset S3. The top 100 most highly expressed DE genes in each section.**

DE gene lists were filtered for the 100 genes with the highest expression in a cell type at one developmental time and are provided here. The genes that were found in only one section from the top 100 lists are also included.

#### **Supplementary Dataset S4. DE genes expressed in only one section.**

The DE list was filtered for genes that were expressed only in one developmental section. Expression in the other 2 sections was restricted to less than 0.2.

#### **Supplementary Dataset S5. Transcription factor identification comparison.**

The whole section transcription factor list identified by Li et al., 2010 was converted to B73 RefGen\_v2 resulting in a final list of 885 genes which was compared to genes identified as potentially having transcription factor activity from the DE list. Column A contains the mapman annotation for the genes identified in the whole section data listed in column B. Column C shows any matches to BS-biased genes and D any M-biased genes. Note a few genes have annotations in both BS and M columns denoting a switch from one cell type bias to the other over the developmental sections.

The second page compares the BS and M-biased transcription factors with datasets from Wang et al., 2013, Chang et al., 2012 and Pick et al., 2011. Column G in blue denotes the matches with our BS-biased results and column H in green denotes the matches with our M-biased data. Columns D, E, F are the log<sub>2</sub>BS/M ratios for each of the sections.

#### **Supplemental Figure 1: Metabolism-related Transcripts Remain DE from SST.**

Heat maps representing DE gene expression for select C4-related metabolic pathways. Columns represent leaf sections from youngest to oldest left to right and rows represent different genes with the predicted activities indicated on the left. Green signifies an M-biased ratio and blue represents a BS-biased ratio. The color scale represents the log<sub>2</sub>BS/M value and is from -3 (green) to +3 (blue) where 0 (white) represents no difference in BS and M values.

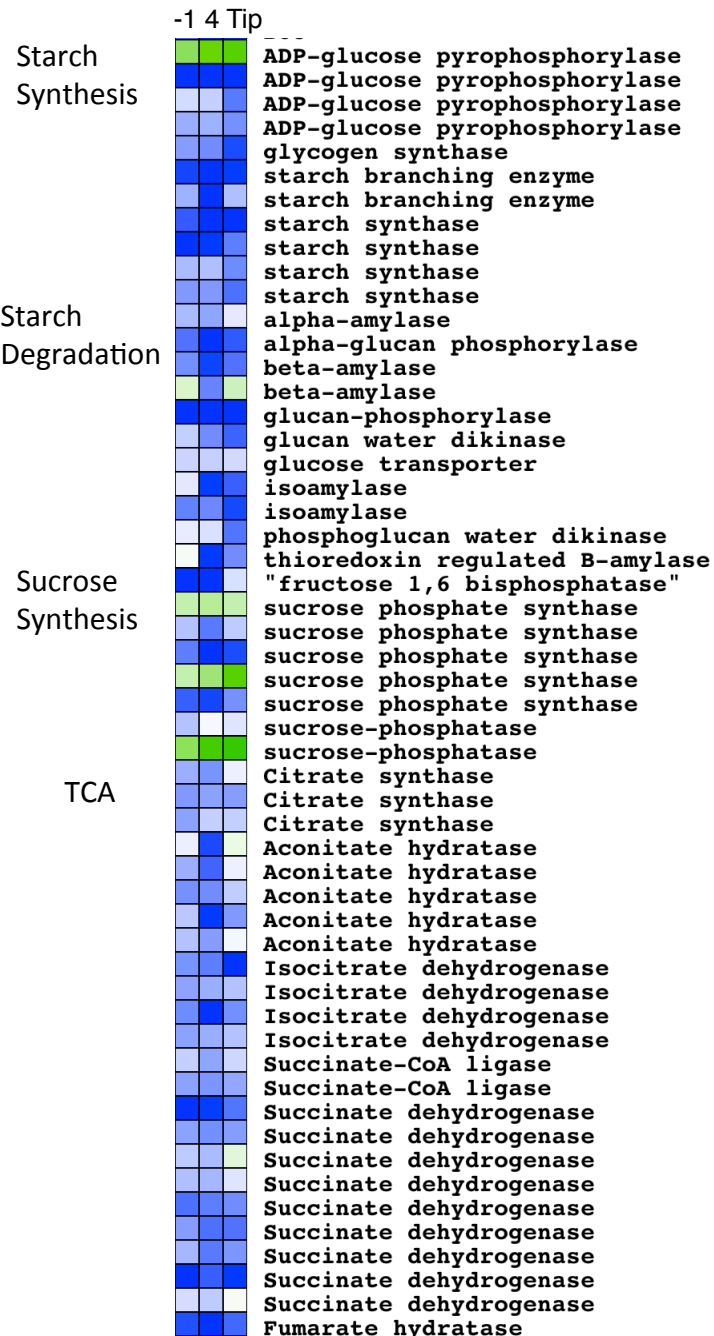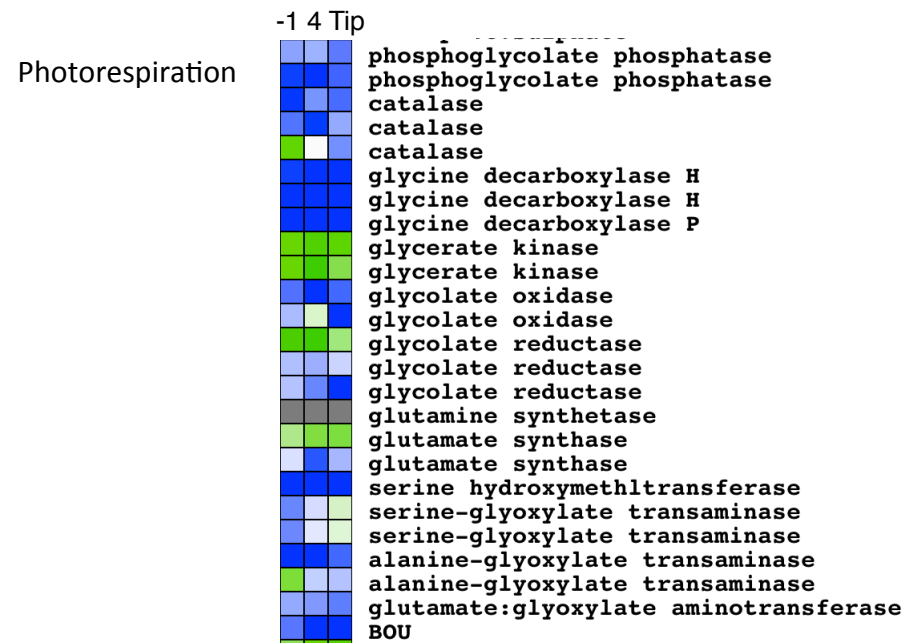

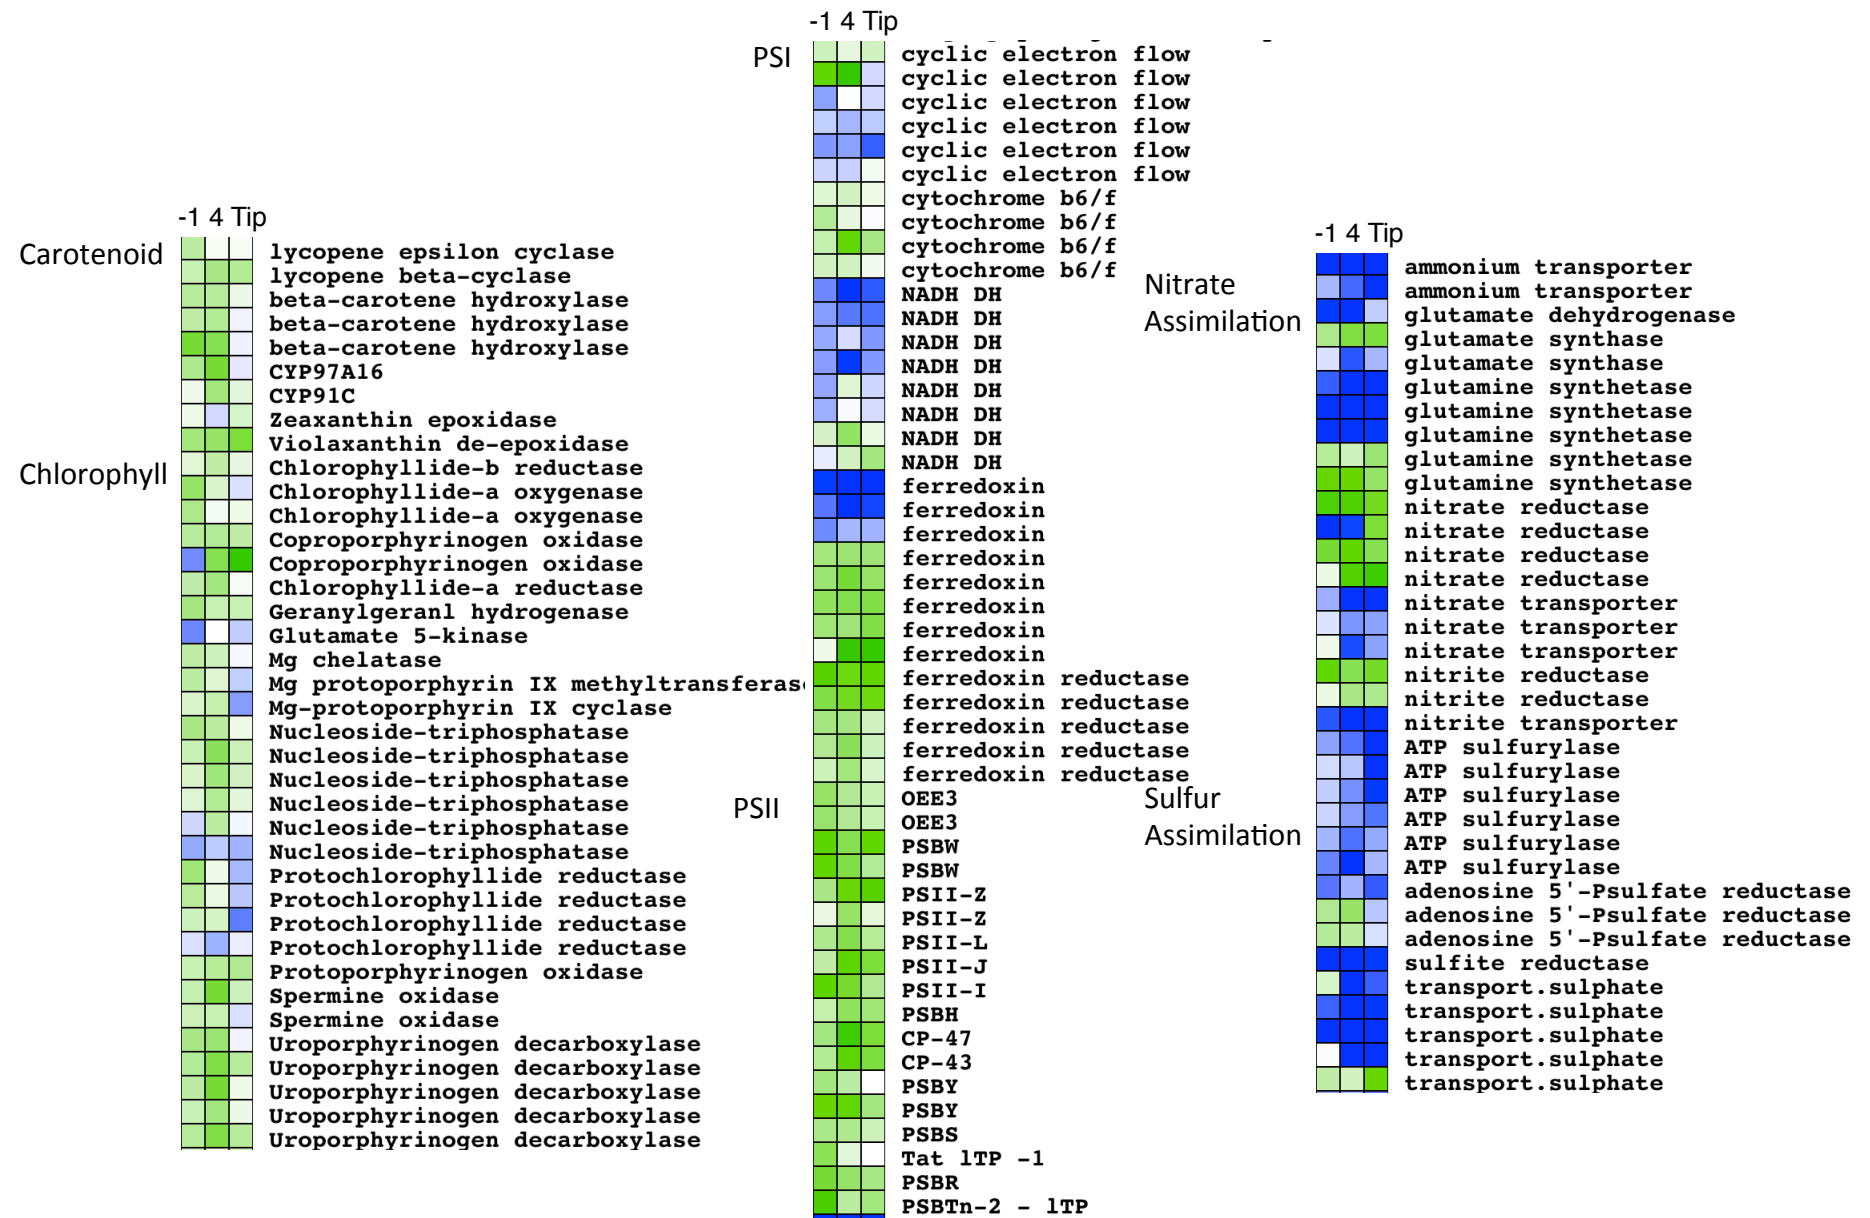

Supplement: supp_eru152_jexbot121491_file002.pdf [file supp_eru152_jexbot121491_file002.pdf]
